# Supplementary material
Source: Springer Nature journal article supplement (https://www.springermedizin.de/resource/supplementary/12986_2011_319_MOESM1_ESM.pdf/25655822)
Supplement: MOESM1 [file 25655822]

**SSIP 10 sites: Stratified random sampling**

**(N=19973)**

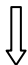

**Four sites: Assam, Delhi, Lucknow and**

**Trivandrum (N=9600)**

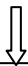

**Biochemical variables: Stratified  
random sub-sampling (N=6000)**

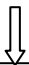

**CRP estimation: Random  
sampling (N=600)**

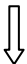

**Complete risk factor  
data (N=581)**
